# Supplementary material
Source: Springer Nature journal article supplement (https://www.springermedizin.de/resource/supplementary/13054_2004_2953_MOESM1_ESM.pdf/9719416)

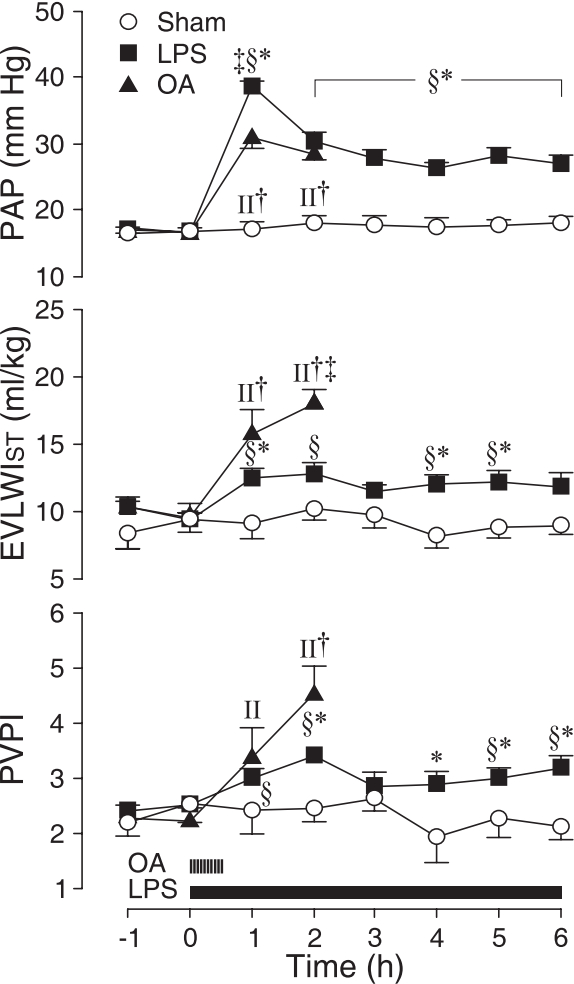

Supplement: MOESM1 [file 9719416]
